# Supplementary material for: Removal of Microcystin-LR by a Novel Native Effective Bacterial Community Designated as YFMCD4 Isolated from Lake Taihu
Source: MDPI journal article supplement (doi:10.3390/toxins10090363), 2018-09-08
Supplement: s1 [file s1]

# Supplementary Materials: Removal of Microcystin-LR by a Novel Native Effective Bacterial Community Designated as YFMCD4 Isolated from Lake Taihu

Fei Yang <sup>1,2,3,\*</sup>, Jian Guo <sup>1</sup>, Feiyu Huang <sup>1</sup>, Isaac Yaw Massey <sup>1</sup>, Ruixue Huang <sup>1,\*</sup>, Yunhui Li <sup>2</sup>, Cong Wen <sup>1</sup>, Ping Ding <sup>1</sup>, Weiming Zeng <sup>4</sup> and Geyu Liang <sup>2</sup>

<sup>1</sup> Department of Occupational and Environmental Health, Xiangya School of Public Health, Central South University, 110 Xiangya Road, Changsha 410078, China; guojianph@csu.edu.cn (J.G.); huangfeiyu@csu.edu.cn (F.H.); robert@csu.edu.cn (I.Y.M.); wencong941017@csu.edu.cn (C.W.); yixp176911007@csu.edu.cn (P.D.)

<sup>2</sup> Key Laboratory of Environmental Medicine Engineering, Ministry of Education, School of Public Health Southeast University, Nanjing 210009, China; yhli@seu.edu.cn (Y.L.); gyliang@seu.edu.cn (G.L.)

<sup>3</sup> Key laboratory of Hunan Province for Water Environment and Agriculture Product Safety, Central South University, Changsha 410083, China;

<sup>4</sup> Key Laboratory of Biometallurgy, Ministry of Education, School of Minerals Processing and Bioengineering, Central South University, Changsha 410083, China; hyacinth\_hai@csu.edu.cn (W.Z.)

\* Correspondence: phfyang@csu.edu.cn (F.Y.); zhengshl@csu.edu.cn (R.H.); Tel./Fax: +86-731-84805460 (F.Y. & R.H.)

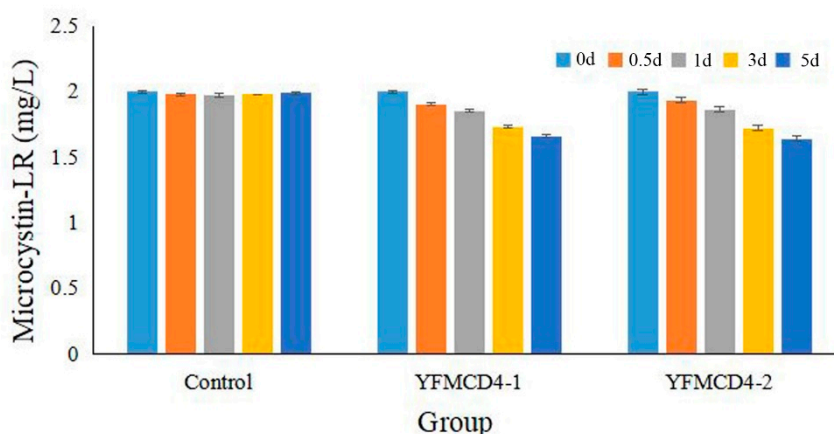

**Figure S1.** The degradation activities of MC-LR by YFMCD4-1 and YFMCD4-2.
